# Supplementary material for: Remoulding a MOF’s pores by auxiliary ligand introduction for stability improvement and highly selective CO2-capture
Source: Royal Society of Chemistry journal article supplement (doi:10.1039/c8cc06593d), 2018-01-01
Supplement: c8cc06593d1.pdf [file c8cc06593d1.pdf]

## Supporting Information

### **Remoulding MOFs pore by auxiliary ligand introduction for stability improvement and highly selective CO<sub>2</sub>-capture**

Qing-Qing Zhang,<sup>a</sup> Xiao-Fei Liu,<sup>a</sup> Lin Ma,<sup>a</sup> Yong-Sheng Wei,<sup>a</sup> Zhao-Yang Wang,<sup>a</sup> Hong Xu\*<sup>a</sup> and Shuang-Quan Zang\*<sup>a</sup>

<sup>a</sup> College of Chemistry and Molecular Engineering, Zhengzhou University,  
Zhengzhou 450001, China.

## Experimental section

### Materials and instrumentation

All the reagents and solvents employed were commercially available and used as supplied without further purification. Tris (3-pyridyl)-1,3,5-benzene (TPB) was synthesized according to the literature.<sup>1</sup> <sup>1</sup>H NMR and <sup>13</sup>C NMR spectra were recorded on a Bruker DRX spectrometer operating at 400 MHz in DMSO-*d*<sub>6</sub>. Elemental analyses (EA) were conducted using a Perkin-Elmer 240 elemental analyzer. Thermogravimetry analyses (TGA) were performed using a TA Q50 instrument from room temperature to 800 °C at a rate of 10 °C / min under N<sub>2</sub> flow. Powder X-ray diffraction (PXRD) patterns of the samples were recorded on a Rigaku B/Max-RB diffractometer with Cu-K $\alpha$  radiation ( $\lambda = 1.5418 \text{ \AA}$ ) at room temperature. Gas sorption isotherms were measured by a BEL-max physisorption analyzer with activated samples. X-ray photoelectron spectroscopy (XPS) was conducted by HP5950A XPS with an Mg-K $\alpha$  as source and the C 1s peak at 284.6 eV as an internal standard.

### Synthesis of 2,4,6-tris(3,5-dimethylphenyl)pyridine (L<sub>1</sub>)

The organic ligand L<sub>1</sub> was synthesized according to the literature methods with slight modification, as shown in **Fig. S1**. 3,5-dimethylbenzaldehyde (20.2 mmol), 1-(3,5-dimethylphenyl) ethanone (40.4 mmol), ammonium acetate (404 mmol) and acetic acid (40 mL) were introduced to a round-bottom flask. Then, the mixture was stirred at 140 °C for 8 hours. After cooling to room temperature, the solution was poured into water and stirred for another hour. Subsequently, the resulting brown oily substance was dissolved in 3 mL ethanol. Filtrating, washing with ethanol, and drying under high vacuum afforded the desired product as a white solid. <sup>1</sup>H NMR (400 MHz, DMSO-*d*<sub>6</sub>):  $\delta = 8.07$  (s, 2 H), 7.90 (s, 4 H), 7.83 (s, 2 H), 7.15 (d, 3 H), 2.42 (s, 18 H) ppm. Elemental analyses calcd. (%) for C<sub>15</sub>H<sub>12</sub>N: C 87.38, H 5.83, N 6.79 %; found: C 87.43, H 5.77, N 6.80 %.

### Synthesis of 5,5',5''-(pyridine-2,4,6-triyl)triisophthalic acid (H<sub>6</sub>pydc)

A mixture of L<sub>1</sub> (1 g), H<sub>2</sub>O (10 mL) and HNO<sub>3</sub> (3 mL) was sealed in a glass vial. The vial was tightly capped and placed in a 180 °C oven for 24 h. After being cooled to room temperature, the yellow reaction product was filtrated, washed with water and dried in air. <sup>1</sup>H NMR (400 MHz, DMSO-*d*<sub>6</sub>):  $\delta = 13.49$  (s, 6 H), 9.05 (s, 4 H), 8.75 (s, 2 H), 8.6 (s, 3 H), 8.5 (s, 2 H) ppm. Elemental analyses calcd. (%) for C<sub>29</sub>H<sub>17</sub>NO<sub>12</sub>: C 60.95, H 3.00, N 2.45 %; found: C 58.09, H 3.34, N 3.12 %.

### Synthesis of Co-pydc

A mixture of  $\text{Co}(\text{NO}_3)_2 \cdot 6\text{H}_2\text{O}$  (18 mg, 0.06 mmol),  $\text{H}_6\text{pydc}$  (11 mg, 0.02 mmol), *N,N*-dimethylformamide (DMF) (2 mL) and  $\text{H}_2\text{O}$  (0.5 mL) was stirred for 10 min in air, and then 150  $\mu\text{L}$  fluoroboric acid ( $\text{HBF}_4$ ) was added. Thereafter, the red suspension was transferred in a 23 mL teflon-lined stainless steel autoclave and kept at 120 °C for 3 d. After cooling to room temperature slowly, red fusiform-shaped crystals of **Co-pydc** were obtained. For further analysis, the crystalline samples were washed with fresh DMF and dried in air. Yield: 42% (based on Co). Elemental analyses calcd. (%) for  $[\text{Co}_3(\mu_3\text{-OH})(\text{pydc})(\text{H}_2\text{O})_3] \cdot 3\text{DMF} \cdot 8\text{H}_2\text{O}$ : C 38.79, H 4.71, N 4.76; found: C 38.71, H 4.66, N 4.87.

### Synthesis of Co-pydc-TPB

$\text{Co}(\text{NO}_3)_2 \cdot 6\text{H}_2\text{O}$  (18 mg, 0.06 mmol) and  $\text{H}_6\text{pydc}$  (11 mg, 0.02 mmol) were dissolved in *N,N*-dimethylformamide (DMF) (2 mL) and  $\text{H}_2\text{O}$  (0.5 mL). The solution was stirred for 10 min in air, followed by an addition of TPB (5 mg, 0.016 mmol). After another 10 min stirring, 150  $\mu\text{L}$  fluoroboric acid ( $\text{HBF}_4$ ) was added. The resulting mixture was transferred into a 23 ml Teflon-lined autoclave and heated at 120 °C for 3 days. After cooling to room temperature, red hexagonal crystals of **Co-pydc-TPB** were obtained. For further analysis, the crystalline samples were washed with fresh DMF and dried in air. Yield: 65% (based on Co). Elemental analyses calcd. (%) for  $[\text{Co}_3(\mu_3\text{-OH})(\text{pydc})(\text{TPB})] \cdot 2\text{DMF} \cdot 2\text{H}_2\text{O}$ : C 53.82, H 3.55, N 6.72; found: C 53.80, H 3.43, N 6.71.

### Single-Crystal X-ray crystallography

Single-crystal X-ray diffraction data were collected on a Rigaku XtaLAB Pro diffractometer with  $\text{Cu-K}\alpha$  radiation ( $\lambda = 1.54184 \text{ \AA}$ ) at room temperature. All structures were solved by the direct method and refined with full-matrix least-squares on  $F^2$  using the *SHELXTL-2014* program package. All host-framework non-hydrogen atoms were refined anisotropically. Hydrogen atoms were placed geometrically. The PLATON SQUEEZE treatment was applied to Co-pydc and Co-pydc-TPB because all of the guest solvent molecules are extremely disordered and cannot be modeled. Refinements were carried out with constraints on a few bond distances, fixed using the DFIX command. The quantities of solvent molecules were confirmed by elemental analyses and thermogravimetry analyses. Crystallographic data and refinement parameters are provided in **Table S1**. Distances and angles are on the whole well defined and summarized in **Table S2 and S3**.

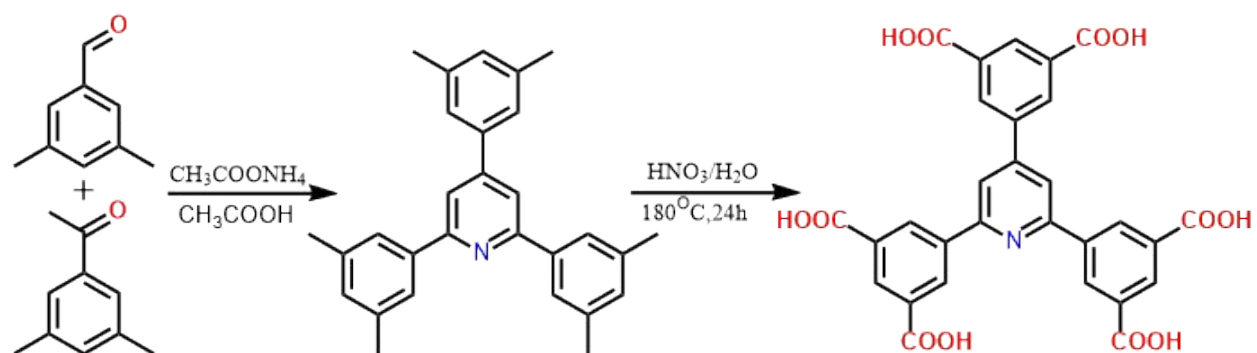

Fig. S1 Synthetic route of H<sub>6</sub>pydc

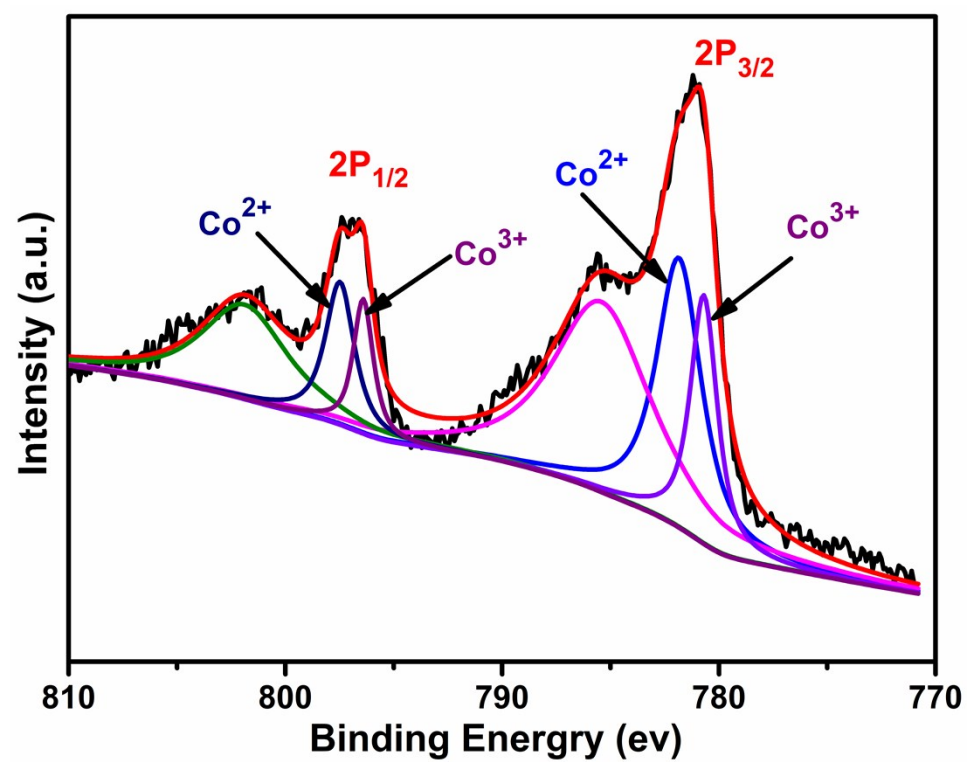

Fig. S2 X-ray photoelectron spectroscopy of Co-pydc

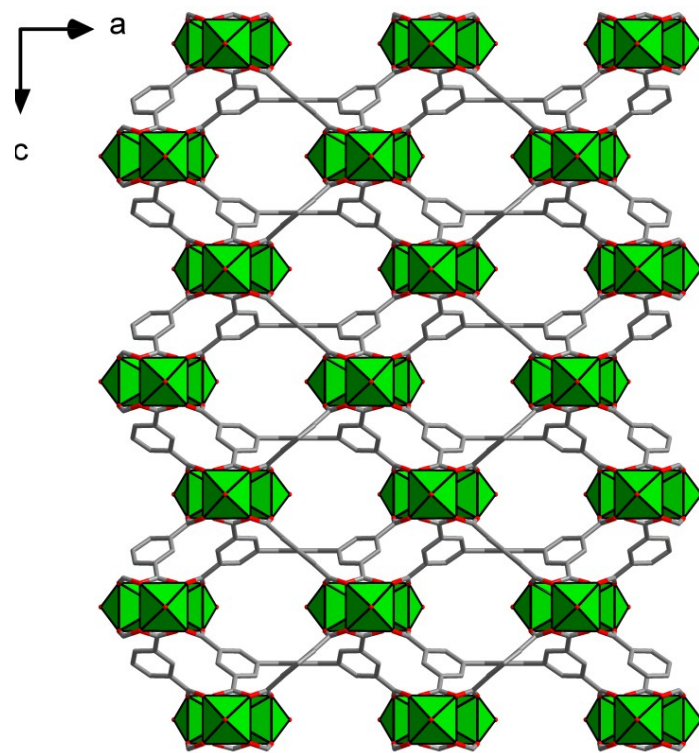

Fig. S3 Perspective view of Co-pydc along *b* axis

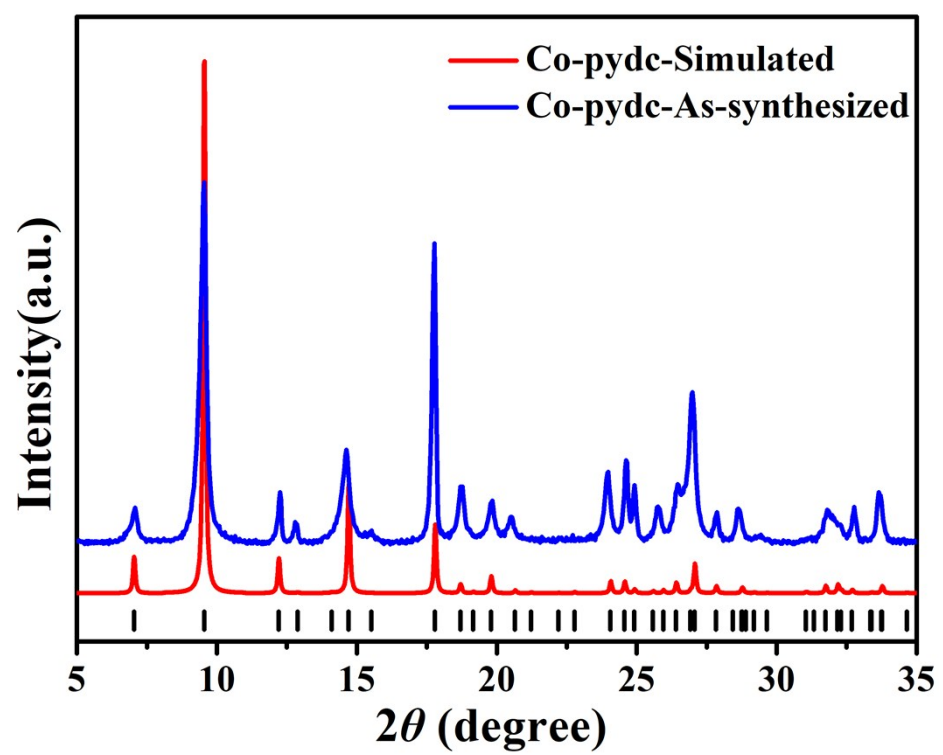

Fig. S4. PXRD patterns of Co-pydc

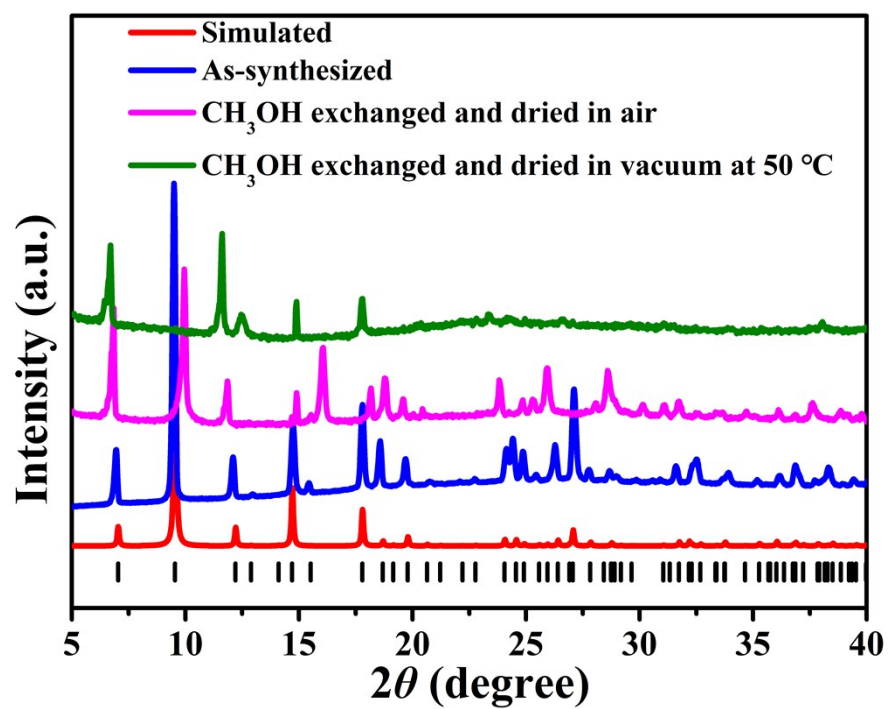

Fig. S5. PXR D patterns of Co-pydc under different conditions

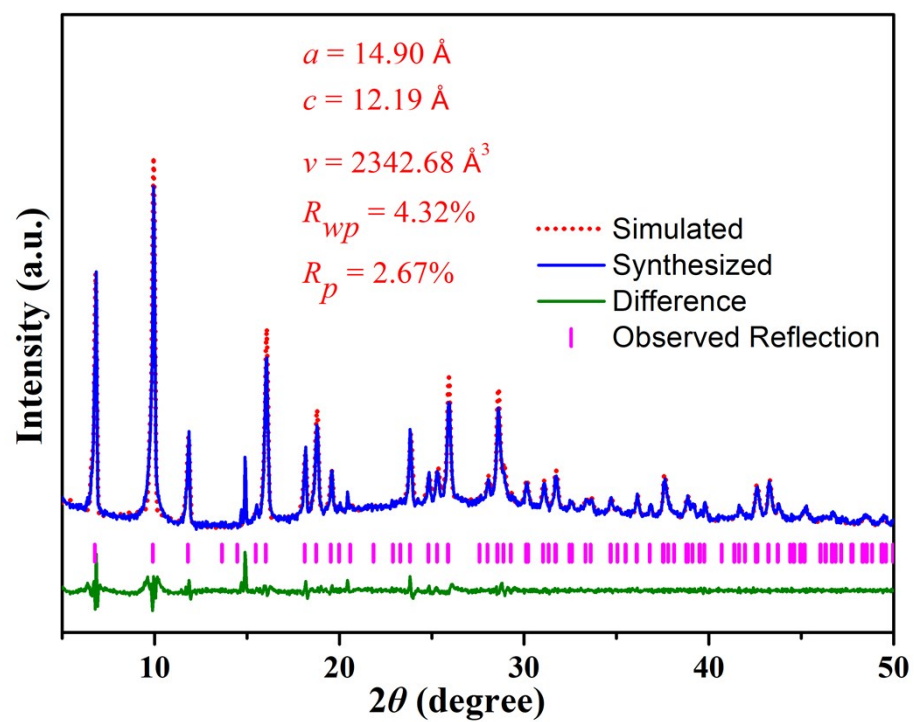

Fig. S6. Pawley refinements of the PXR D patterns of Co-pydc after CH<sub>3</sub>OH exchanging and drying in air

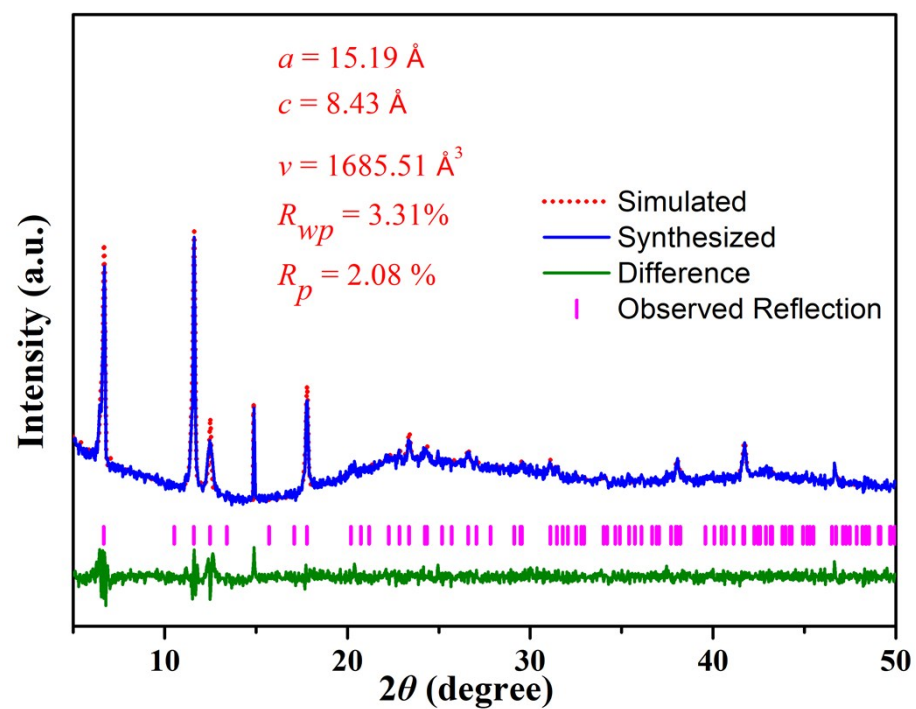

Fig. S7. Pawley refinements of the PXRD patterns of Co-pydc after CH<sub>3</sub>OH exchanging and drying in vacuum at 50 °C

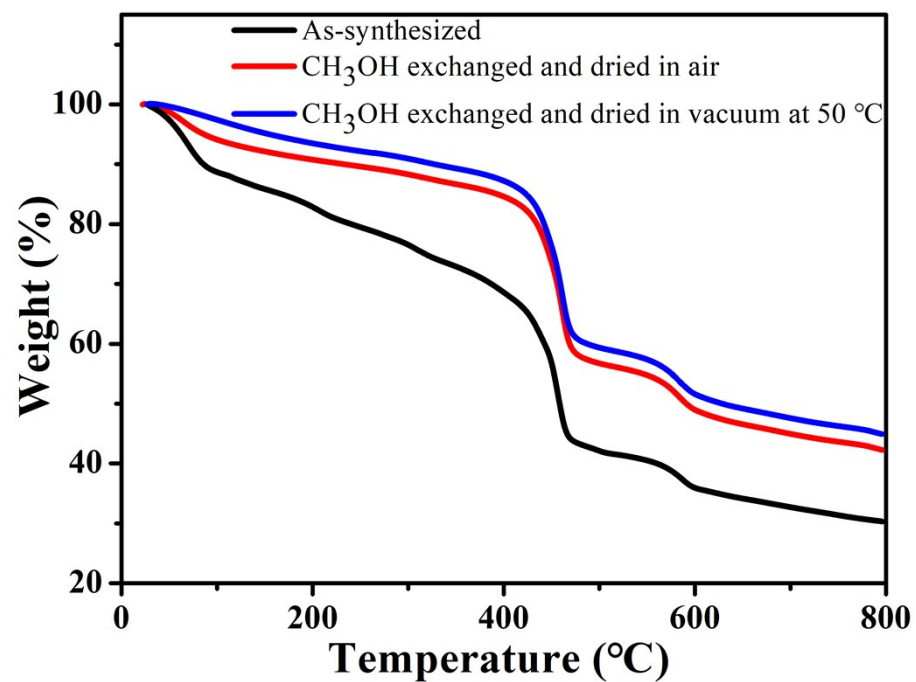

Fig. S8. Thermogravimetric analysis plots of Co-pydc under different conditions



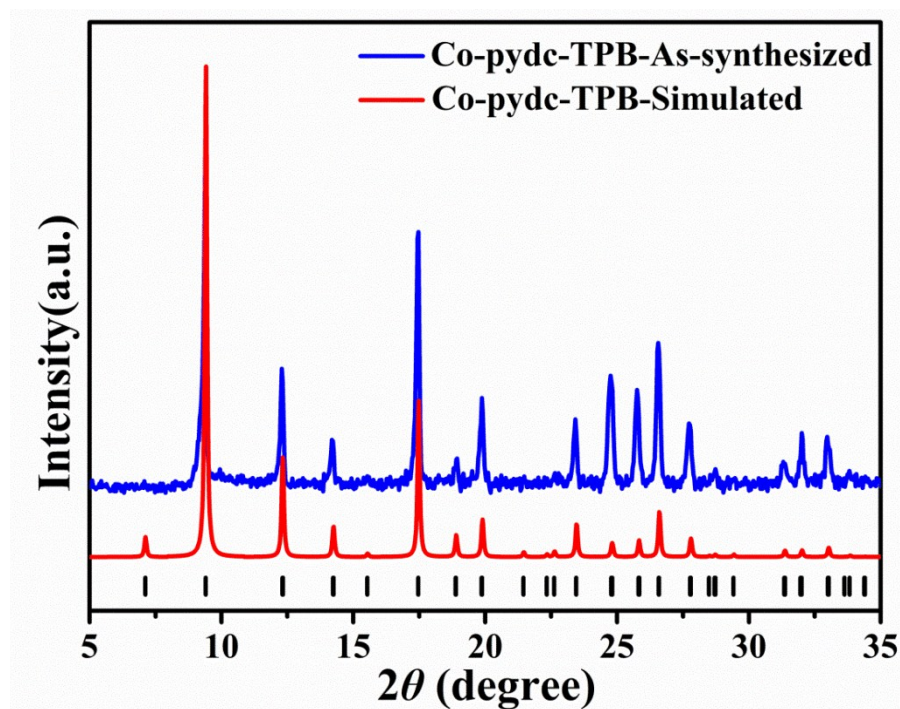

Fig. S9. PXRD patterns of Co-pydc-TPB

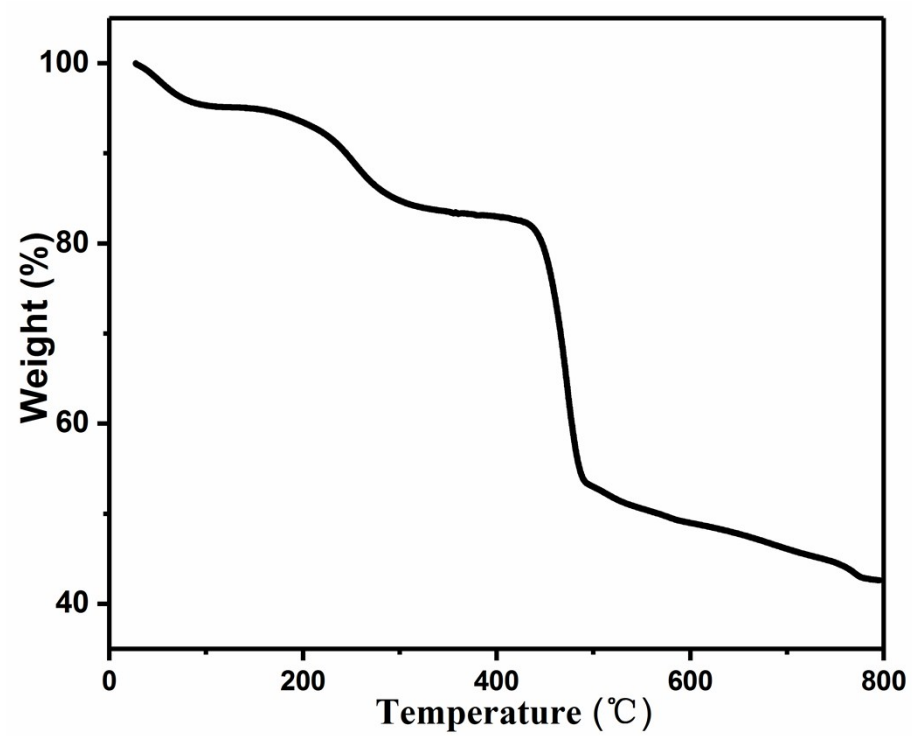

Fig. S10. Thermogravimetric analysis plot of Co-pydc-TPB.



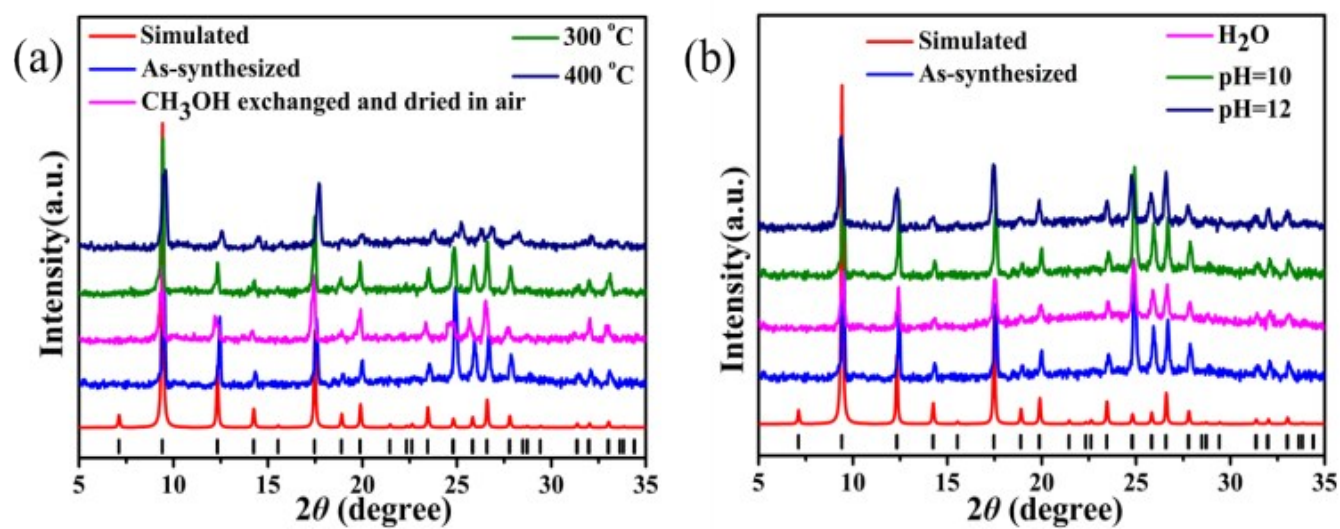

Fig. S11. PXR D patterns of Co-pydc collected during stability test.

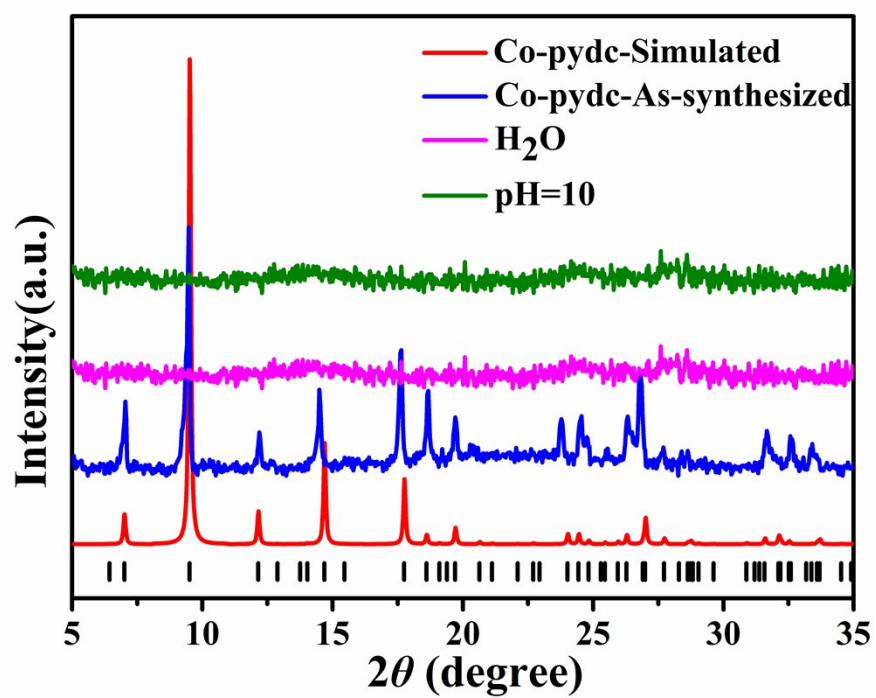

Fig. S12. PXR D patterns of Co-pydc collected during stability test.

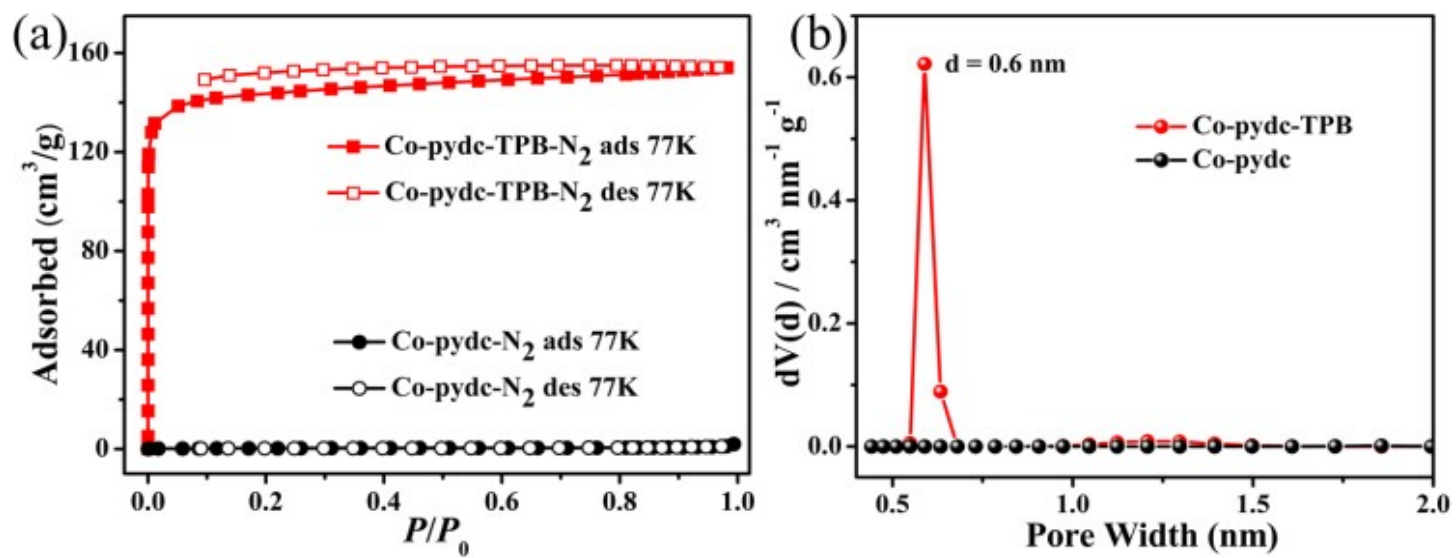

Fig. S13 (a) N<sub>2</sub> adsorption–desorption isotherms at 77 K and (b) pore size distribution of Co-pydc-TPB and Co-pydc.

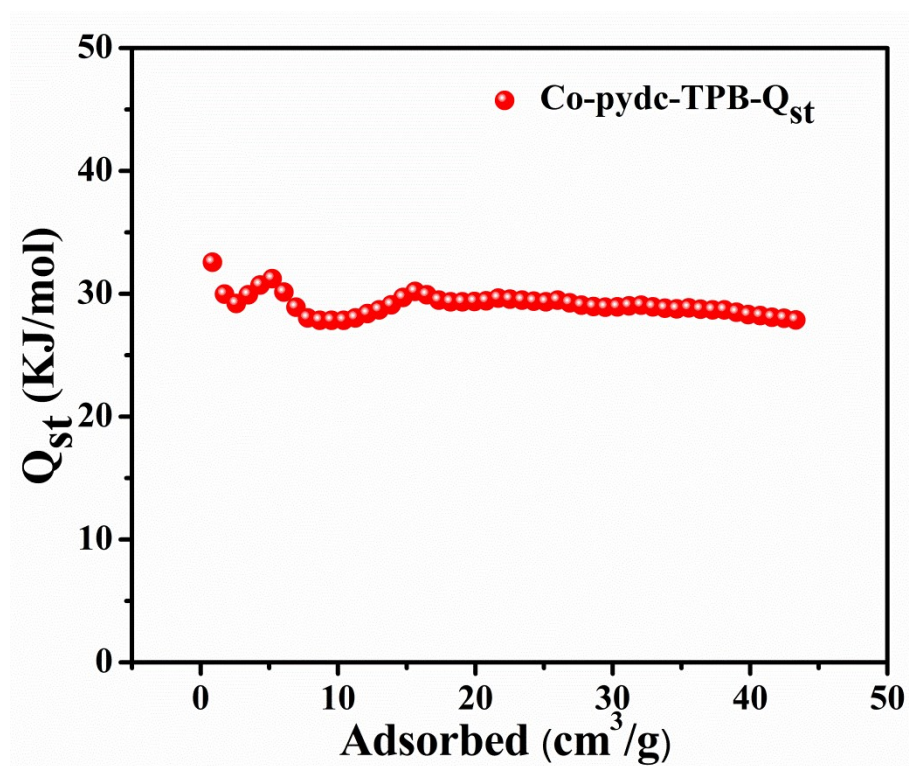

Fig. S14. Isothermic heat of adsorption for CO<sub>2</sub> in Co-pydc-TPB

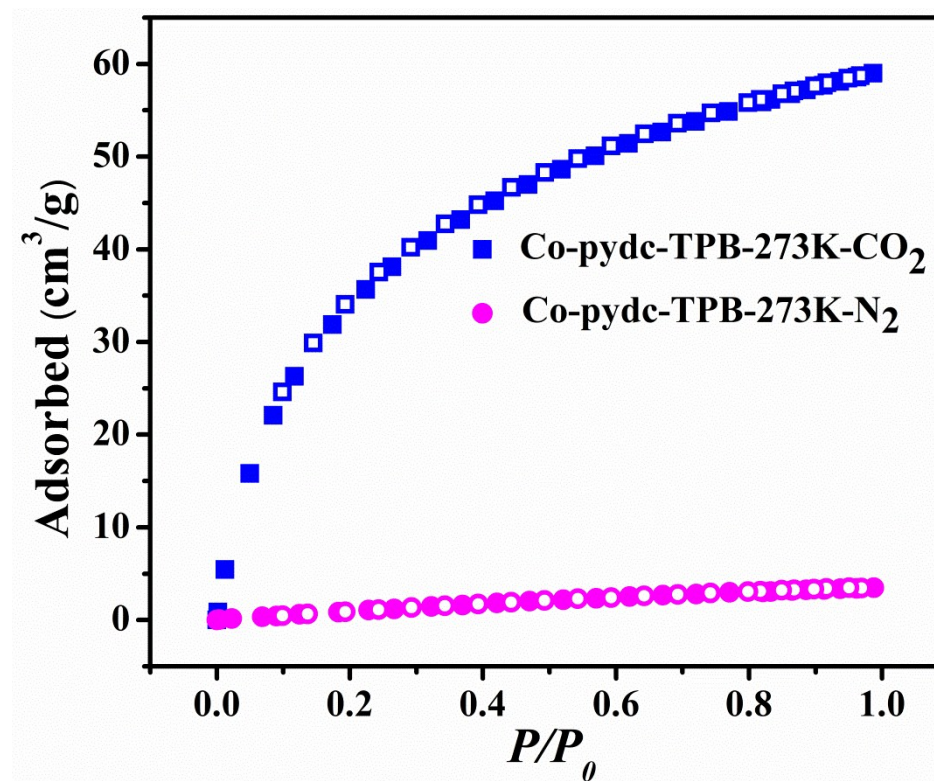

Fig. S15. Adsorption isotherms for the uptake of CO<sub>2</sub> and N<sub>2</sub> at 273 K in Co-pydc-TPB.

A nice fitting of CO<sub>2</sub>, N<sub>2</sub> isotherms adsorption branch of Co-pydc-TPB at 298 K and 273 K have been calculated based on Toth's isotherm model<sup>2</sup>.

$$\text{Toth Model: } M = M_{\max} \cdot B^{(1/n)} \cdot P / (1 + B \cdot P)^{(1/n)} \dots \dots \dots (1)$$

$M$ , gas uptake (mmol g<sup>-1</sup>);  $M_{\max}$ , maximum gas uptake (mmol g<sup>-1</sup>);  $B$  and  $n$ , fitting constants;

$$\text{Henry's law constant } K = \lim_{P \rightarrow 0} \frac{dN}{dP} = B^{(1/n)} \cdot M_{\max} \dots \dots \dots (2)$$

Henry's law selectivity (upper limit selectivity), gas component  $i$  over  $j$   $S_{i,j}$

$$S_{i,j} = K_i / K_j \dots \dots \dots (3)$$

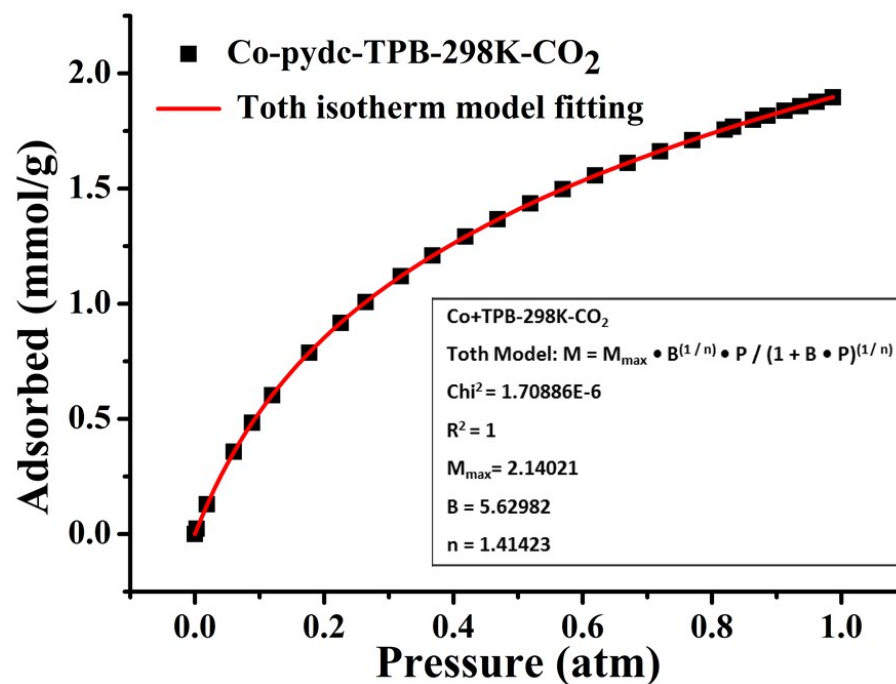

Fig. S16. CO<sub>2</sub> isotherm adsorption of activated Co-pydc-TPB and fitting based on Toth isotherm model;  $M_{\max}$ , maximum uptake; B and n, fitting constants;  $R^2$  fitting error; K, Henry's law constant: 7.263 mmol g<sup>-1</sup> atm<sup>-1</sup>.

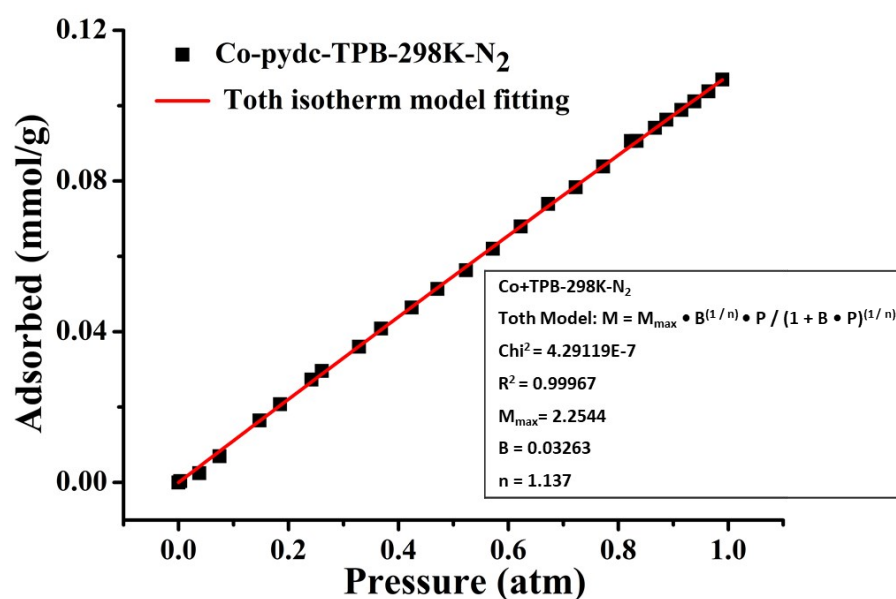

Fig. S17. N<sub>2</sub> isotherm adsorption of activated Co-pydc-TPB and fitting based on Toth isotherm model;  $M_{\max}$ , maximum uptake; B and n, fitting constants;  $R^2$  fitting error; K, Henry's law constant: 0.111 mmol g<sup>-1</sup> atm<sup>-1</sup>.

Henry's law selectivity (upper limit selectivity), gas component CO<sub>2</sub> over N<sub>2</sub>:

$$S_{\text{CO}_2/\text{N}_2} = K_{\text{CO}_2}/K_{\text{N}_2} = 65$$

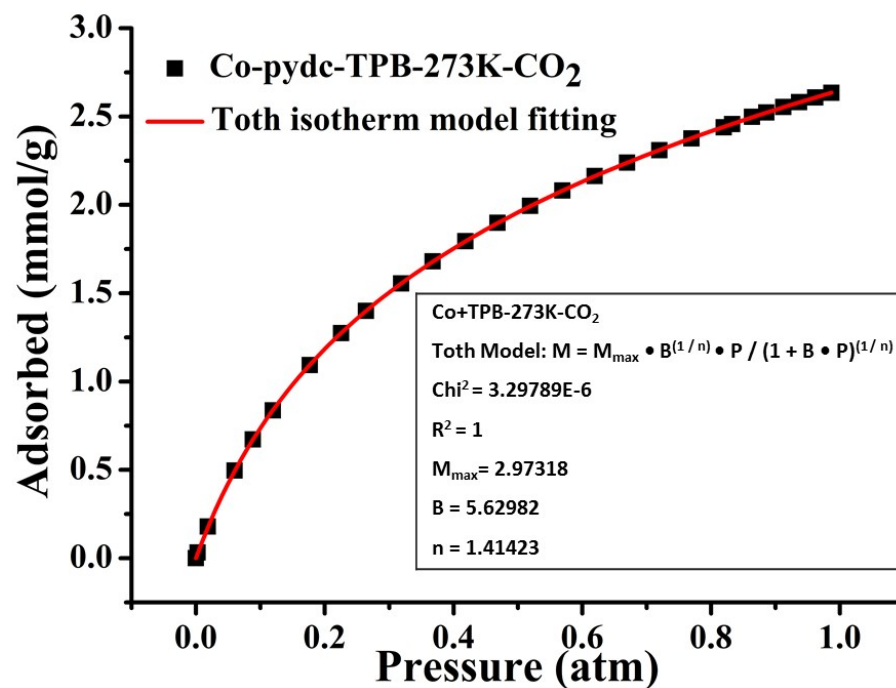

Fig. S18. CO<sub>2</sub> isotherm adsorption of activated Co-pydc-TPB and fitting based on Toth isotherm model;  $M_{\max}$ , maximum uptake; B and n, fitting constants;  $R^2$  fitting error; K, Henry's law constant: 10.090 mmol g<sup>-1</sup> atm<sup>-1</sup>.

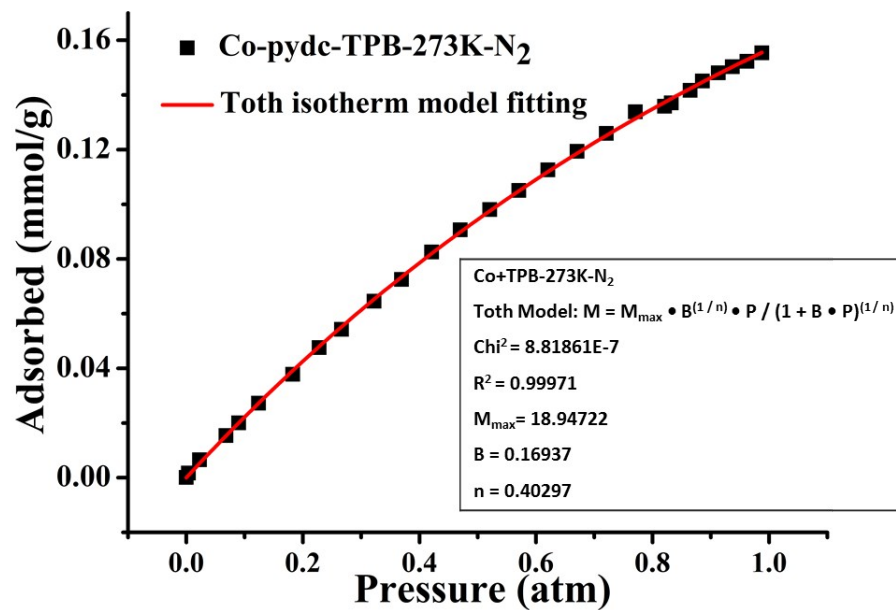

Fig. S19. N<sub>2</sub> isotherm adsorption of activated Co-pydc-TPB and fitting based on Toth isotherm model;  $M_{\max}$ , maximum uptake; B and n, fitting constants;  $R^2$  fitting error; K, Henry's law constant: 0.231 mmol g<sup>-1</sup> atm<sup>-1</sup>.

Henry's law selectivity (upper limit selectivity), gas component CO<sub>2</sub> over N<sub>2</sub>:

$$S_{\text{CO}_2/\text{N}_2} = K_{\text{CO}_2}/K_{\text{N}_2} = 44$$



Table S1. Crystal data and structure refinement for Co-pydc, Co-pydc-TPB and Co-pydc-TPB-activated.

| Compound                               | Co-pydc                                                          | Co-pydc-TPB                                                                    | Co-pydc-TPB-activated                                                          |
|----------------------------------------|------------------------------------------------------------------|--------------------------------------------------------------------------------|--------------------------------------------------------------------------------|
| Empirical formula                      | C <sub>29</sub> H <sub>18</sub> Co <sub>3</sub> NO <sub>16</sub> | C <sub>50</sub> H <sub>28</sub> Co <sub>3</sub> N <sub>4</sub> O <sub>13</sub> | C <sub>50</sub> H <sub>28</sub> Co <sub>3</sub> N <sub>4</sub> O <sub>13</sub> |
| Formula weight                         | 813.23                                                           | 1069.67                                                                        | 1069.67                                                                        |
| Temperature/K                          | 100.01(10)                                                       | 150.00(10)                                                                     | 150.00(10)                                                                     |
| Crystal system                         | hexagonal                                                        | hexagonal                                                                      | hexagonal                                                                      |
| Space group                            | <i>P</i> -62 <i>c</i>                                            | <i>P</i> -62 <i>c</i>                                                          | <i>P</i> -62 <i>c</i>                                                          |
| <i>a</i> /Å                            | 14.5594(5)                                                       | 14.3390(2)                                                                     | 14.3406(2)                                                                     |
| <i>b</i> /Å                            | 14.5594(5)                                                       | 14.3390(2)                                                                     | 14.3406(2)                                                                     |
| <i>c</i> /Å                            | 13.7247(7)                                                       | 14.3590(3)                                                                     | 14.1626(4)                                                                     |
| $\alpha$ /°                            | 90                                                               | 90                                                                             | 90                                                                             |
| $\beta$ /°                             | 90                                                               | 90                                                                             | 90                                                                             |
| $\gamma$ /°                            | 120                                                              | 120                                                                            | 120                                                                            |
| Volume/Å <sup>3</sup>                  | 2519.5(2)                                                        | 2556.78(11)                                                                    | 2522.37(10)                                                                    |
| <i>Z</i>                               | 2                                                                | 2                                                                              | 2                                                                              |
| $\rho_{\text{calc}}$ /cm <sup>3</sup>  | 1.071                                                            | 1.389                                                                          | 1.407                                                                          |
| $\mu$ /mm <sup>-1</sup>                | 1.025                                                            | 8.085                                                                          | 8.195                                                                          |
| F(000)                                 | 814.0                                                            | 1082.0                                                                         | 1080.0                                                                         |
| Crystal size/mm <sup>3</sup>           | 0.15 × 0.1 × 0.1                                                 | 0.1 × 0.1 × 0.1                                                                | 0.1 × 0.1 × 0.1                                                                |
| Radiation                              | MoK $\alpha$ ( $\lambda$ = 0.71073)                              | CuK $\alpha$ ( $\lambda$ = 1.54184)                                            | CuK $\alpha$ ( $\lambda$ = 1.54184)                                            |
| 2 $\theta$ range for data collection/° | 4.386 to 52.988                                                  | 7.118 to 144.79                                                                | 7.118 to 132.98                                                                |
| Index ranges                           | -16 ≤ <i>h</i> ≤ 19, -19 ≤ <i>k</i> ≤ 15, -18 ≤ <i>l</i> ≤ 16    | -10 ≤ <i>h</i> ≤ 17, -14 ≤ <i>k</i> ≤ 13, -15 ≤ <i>l</i> ≤ 17                  | -9 ≤ <i>h</i> ≤ 16, -17 ≤ <i>k</i> ≤ 14, -11 ≤ <i>l</i> ≤ 17                   |
| Reflections collected                  | 12677                                                            | 8196                                                                           | 9154                                                                           |
| Independent reflections                | 1821 [R <sub>int</sub> = 0.0462, R <sub>sigma</sub> = 0.0382]    | 1654 [R <sub>int</sub> = 0.0407, R <sub>sigma</sub> = 0.0383]                  | 1526 [R <sub>int</sub> = 0.0632, R <sub>sigma</sub> = 0.0406]                  |

|                                                                                                                                       |                                  |                                  |                                  |
|---------------------------------------------------------------------------------------------------------------------------------------|----------------------------------|----------------------------------|----------------------------------|
| Data/restraints/parameters                                                                                                            | 1821/16/84                       | 1654/6/128                       | 1526/20/137                      |
| Goodness-of-fit on $F^2$                                                                                                              | 1.077                            | 1.114                            | 1.053                            |
| Final R indexes [ $I \geq 2\sigma(I)$ ]                                                                                               | $R_1 = 0.0259$ , $wR_2 = 0.0673$ | $R_1 = 0.0646$ , $wR_2 = 0.1835$ | $R_1 = 0.0593$ , $wR_2 = 0.1619$ |
| Final R indexes [all data]                                                                                                            | $R_1 = 0.0282$ , $wR_2 = 0.0680$ | $R_1 = 0.0695$ , $wR_2 = 0.1914$ | $R_1 = 0.0630$ , $wR_2 = 0.1650$ |
| Largest diff. peak/hole / $e \text{ \AA}^{-3}$                                                                                        | 0.32/-0.21                       | 0.61/-0.63                       | 0.54/-0.41                       |
| CCDC number                                                                                                                           | 1851529                          | 1851530                          | 1851531                          |
| $^a R_1 = \frac{\sum   F_o  -  F_c  }{\sum  F_o }$ . $^b wR_2 = \left[ \frac{\sum w(F_o^2 - F_c^2)^2}{\sum w(F_o^2)^2} \right]^{1/2}$ |                                  |                                  |                                  |



Table S2. Selected bond lengths (Å) and bond angles (°) for Co-pydc

| <b>bond lengths (Å)</b>                                                                                                     |            |                                      |            |
|-----------------------------------------------------------------------------------------------------------------------------|------------|--------------------------------------|------------|
| Co1–O4 <sup>1</sup>                                                                                                         | 2.084(2)   | O4–Co1 <sup>4</sup>                  | 2.084(2)   |
| Co1–O4 <sup>2</sup>                                                                                                         | 2.084(2)   | Co1–O1                               | 2.0237(5)  |
| Co1–O3 <sup>3</sup>                                                                                                         | 2.063(2)   | O1–Co1 <sup>2</sup>                  | 2.0237(5)  |
| Co1–O3                                                                                                                      | 2.063(2)   | O1–Co1 <sup>4</sup>                  | 2.0237(5)  |
| Co1–O2                                                                                                                      | 2.111(3)   |                                      |            |
| <b>bond angles (°)</b>                                                                                                      |            |                                      |            |
| O4 <sup>1</sup> –Co1–O4 <sup>2</sup>                                                                                        | 89.73(14)  | O3 <sup>3</sup> –Co1–O4 <sup>2</sup> | 173.98(10) |
| O4 <sup>1</sup> –Co1–O2                                                                                                     | 88.02(10)  | O3–Co1–O4 <sup>2</sup>               | 90.63(11)  |
| O4 <sup>2</sup> –Co1–O2                                                                                                     | 88.02(10)  | O3–Co1–O4 <sup>1</sup>               | 173.98(10) |
| O3 <sup>3</sup> –Co1–O4 <sup>1</sup>                                                                                        | 90.63(11)  | O3–Co1–O3 <sup>3</sup>               | 88.39(16)  |
| O3–Co1–O2                                                                                                                   | 85.98(10)  | O3 <sup>3</sup> –Co1–O2              | 85.98(10)  |
| O1–Co1–O4 <sup>2</sup>                                                                                                      | 93.55(7)   | O1–Co1–O4 <sup>1</sup>               | 93.55(7)   |
| O1–Co1–O3 <sup>3</sup>                                                                                                      | 92.43(7)   | O1–Co1–O3                            | 92.43(7)   |
| O1–Co1–O2                                                                                                                   | 177.78(11) | C1–O4–Co1 <sup>4</sup>               | 132.9(2)   |
| Co1–O1–Co1 <sup>4</sup>                                                                                                     | 120.0      | C1–O3–Co1                            | 135.9(2)   |
| Co1 <sup>2</sup> –O1–Co1 <sup>4</sup>                                                                                       | 120.0      | Co1 <sup>2</sup> –O1–Co1             | 120.0      |
| Symmetry codes: <sup>1</sup> +Y-X,1-X,3/2-Z; <sup>2</sup> +Y-X,1-X,+Z; <sup>3</sup> +X,+Y,3/2-Z; <sup>4</sup> 1-Y,1+X-Y,+Z. |            |                                      |            |

Table S3. Selected bond lengths (Å) and bond angles (°) for Co-pydc-TPB

| <b>bond lengths (Å)</b>                                                                                                     |            |                                       |            |
|-----------------------------------------------------------------------------------------------------------------------------|------------|---------------------------------------|------------|
| Co1–O1                                                                                                                      | 2.0385(13) | Co1–N1                                | 2.158(6)   |
| Co1–O2                                                                                                                      | 2.085(5)   | O1–Co1 <sup>4</sup>                   | 2.0385(14) |
| Co1–O2 <sup>1</sup>                                                                                                         | 2.085(5)   | O1–Co1 <sup>3</sup>                   | 2.0385(13) |
| Co1–O3 <sup>2</sup>                                                                                                         | 2.063(5)   | O3–Co1 <sup>4</sup>                   | 2.063(5)   |
| Co1–O3 <sup>3</sup>                                                                                                         | 2.063(5)   |                                       |            |
| <b>bond angles (°)</b>                                                                                                      |            |                                       |            |
| O1–Co1–O2                                                                                                                   | 95.06(18)  | O3 <sup>3</sup> –Co1–O2               | 89.4(3)    |
| O1–Co1–O2 <sup>1</sup>                                                                                                      | 95.06(18)  | O3 <sup>2</sup> –Co1–O2               | 174.3(2)   |
| O1–Co1–O3 <sup>2</sup>                                                                                                      | 90.63(16)  | O3 <sup>3</sup> –Co1–O3 <sup>2</sup>  | 90.2(4)    |
| O1–Co1–O3 <sup>3</sup>                                                                                                      | 90.63(16)  | O3 <sup>2</sup> –Co1–N1               | 87.6(5)    |
| O1–Co1–N1                                                                                                                   | 172.6(5)   | O3 <sup>3</sup> –Co1–N1               | 82.2(6)    |
| O2–Co1–O2 <sup>1</sup>                                                                                                      | 90.5(4)    | Co1 <sup>2</sup> –O1–Co1 <sup>4</sup> | 120.0      |
| O2–Co1–N1                                                                                                                   | 86.7(5)    | Co1 <sup>2</sup> –O1–Co1              | 120.000(1) |
| O2 <sup>1</sup> –Co1–N1                                                                                                     | 92.1(6)    | Co1 <sup>4</sup> –O1–Co1              | 120.000(1) |
| O3 <sup>2</sup> –Co1–O2 <sup>1</sup>                                                                                        | 89.4(3)    | C1–O2–Co1                             | 129.7(5)   |
| O3 <sup>3</sup> –Co1–O2 <sup>1</sup>                                                                                        | 174.3(2)   | C1–O3–Co1 <sup>4</sup>                | 137.0(5)   |
| Symmetry codes: <sup>1</sup> +X,+Y,3/2-Z; <sup>2</sup> +Y-X,1-X,3/2-Z; <sup>3</sup> +Y-X,1-X,+Z; <sup>4</sup> 1-Y,1+X-Y,+Z. |            |                                       |            |

Table S4. Selected bond lengths (Å) and bond angles (°) for Co-pydc-TPB-activated

| bond lengths (Å)                                                                                                            |            |                                       |            |
|-----------------------------------------------------------------------------------------------------------------------------|------------|---------------------------------------|------------|
| Co1–O1                                                                                                                      | 2.038(2)   | O1–Co1 <sup>4</sup>                   | 2.038(2)   |
| Co1–O3 <sup>1</sup>                                                                                                         | 2.096(10)  | O1–Co1 <sup>2</sup>                   | 2.038(2)   |
| Co1–O3 <sup>2</sup>                                                                                                         | 2.096(10)  | O3–Co1 <sup>4</sup>                   | 2.096(10)  |
| Co1–O2                                                                                                                      | 2.049(10)  | Co1–N1                                | 2.179(19)  |
| Co1–O2 <sup>3</sup>                                                                                                         | 2.049(10)  |                                       |            |
| bond angles (°)                                                                                                             |            |                                       |            |
| O1–Co1–O3 <sup>1</sup>                                                                                                      | 94.1(3)    | O2 <sup>3</sup> –Co1–O3 <sup>1</sup>  | 176.1(5)   |
| O1–Co1–O3 <sup>2</sup>                                                                                                      | 94.1(3)    | O2 <sup>3</sup> –Co1–O3 <sup>2</sup>  | 88.2(7)    |
| O1–Co1–O2 <sup>3</sup>                                                                                                      | 89.8(3)    | O2–Co1–O2 <sup>3</sup>                | 91.0(9)    |
| O1–Co1–O2                                                                                                                   | 89.8(3)    | O2 <sup>3</sup> –Co1–N1               | 86.4(4)    |
| O1–Co1–N1                                                                                                                   | 174.5(4)   | C2–N1–Co1                             | 116.3(13)  |
| O3 <sup>1</sup> –Co1–O3 <sup>2</sup>                                                                                        | 92.3(8)    | C3–N1–Co1                             | 122.3(18)  |
| O3 <sup>1</sup> –Co1–N1                                                                                                     | 89.7(4)    | O2–Co1–O3 <sup>1</sup>                | 88.2(7)    |
| O3 <sup>2</sup> –Co1–N1                                                                                                     | 89.7(4)    | O2–Co1–O3 <sup>2</sup>                | 176.1(5)   |
| Co1–O1–Co1 <sup>4</sup>                                                                                                     | 120.001(1) | O2–Co1–N1                             | 86.4(4)    |
| C1–O3–Co1 <sup>4</sup>                                                                                                      | 130.5(10)  | C1–O2–Co1                             | 139.0(10)  |
| Co1 <sup>1</sup> –O1–Co1                                                                                                    | 119.999(1) | Co1 <sup>1</sup> –O1–Co1 <sup>4</sup> | 120.000(1) |
| Symmetry codes: <sup>1</sup> +Y-X,1-X,+Z; <sup>2</sup> +Y-X,1-X,3/2-Z; <sup>3</sup> +X,+Y,3/2-Z; <sup>4</sup> 1-Y,1+X-Y,+Z. |            |                                       |            |

## References:

1. G. Marin, M. Andruh, A. M. Madalan, A. J. Blake, C. Wilson, N. R. Champness and M. Schroder, *Crystal Growth & Design*, 2008, **8**, 964-975.
2. L. L. Tan, H. Li, Y. Tao, S. X. Zhang, B. Wang and Y. W. Yang, *Adv Mater*, 2014, **26**, 7027-7031.
